# Supplementary material for: Single-cell transcriptomics and epigenomics unravel the role of monocytes in neuroblastoma bone marrow metastasis
Source: PubMed Central journal article supplement (PMC10293285; doi:10.1038/s41467-023-39210-0), 2023-06-26
Supplement: 41467_2023_39210_MOESM4_ESM.pdf [file 41467_2023_39210_MOESM4_ESM.pdf]

## **Description of Additional Supplementary Files**

### Supplementary Data 1

Description: scRNA sequencing statistics

### Supplementary Data 2

Description: Copy number variation regions as predicted from scRNA-seq data

### Supplementary Data 3

Description: Cell-cell interactions. p-values are computed from a one-sided permutation test as implemented in the R package CellChat

### Supplementary Data 4

Description: Differentially expressed genes in the overall dataset. p-values derive from gene-wise negative binomial mixed models using large-sample approximation as implemented in the R package nebula

### Supplementary Data 5

Description: Gene set enrichment analysis results for the overall dataset. p-values are based on an adaptive multi-level split Monte-Carlo scheme as implemented in the R package fgsea

### Supplementary Data 6

Description: Gene set enrichment analysis results for myeloid cells. p-values are based on an adaptive multi-level split Monte-Carlo scheme as implemented in the R package fgsea

### Supplementary Data 7

Description: Differentially expressed genes in myeloid cells. p-values derive from gene-wise negative binomial mixed models using large-sample approximation as implemented in the R package nebula

### Supplementary Data 8

Description: scATAC sequencing statistics
